# Supplementary material for: Cu3Ru6Sb8—a new ternary antimonide with a new structure type
Source: Royal Society of Chemistry journal article supplement (doi:10.1039/c6qi00418k), 2016-01-01
Supplement: c6qi00418k1.pdf [file c6qi00418k1.pdf]

# SUPPORTING INFORMATION

## $\text{Cu}_3\text{Ru}_6\text{Sb}_8$ —a new ternary antimonide with a new structure type

Jai Prakash,<sup>a</sup> Nian-Tzu Suen,<sup>a</sup> Minseong Lee,<sup>b</sup> Eun Sang Choi,<sup>b</sup> James A. Ibers,<sup>c</sup> and Svilen Bobev<sup>a</sup>

<sup>a</sup> Department of Chemistry and Biochemistry, University of Delaware, Newark, DE 19716, USA.

<sup>b</sup> Department of Physics and National High Magnetic Field Laboratory, Florida State University, Tallahassee, FL 32310, USA.

<sup>c</sup> Department of Chemistry, Northwestern University, Evanston, IL 60208, USA.

### *Magnetic susceptibility.*

The inverse susceptibility ( $1/\chi$ ) data gathered at low applied field was fit using the modified Curie-Weiss law ( $1/(\chi-\chi_0) = (T-\theta_{\text{CW}})/C$ ) with a temperature independent susceptibility term  $\chi_0$ . As shown in Figure S1, the modified Curie-Weiss law reasonably fits the data. The following fitting parameters were obtained from the slope and the abscissas: effective moment equal to  $0.78 \mu_{\text{B}}$ ,  $\theta_{\text{CW}} = -8.8 \text{ K}$  and  $\chi_0 = 1.29 \times 10^{-3} \text{ emu/mol/Oe}$ .

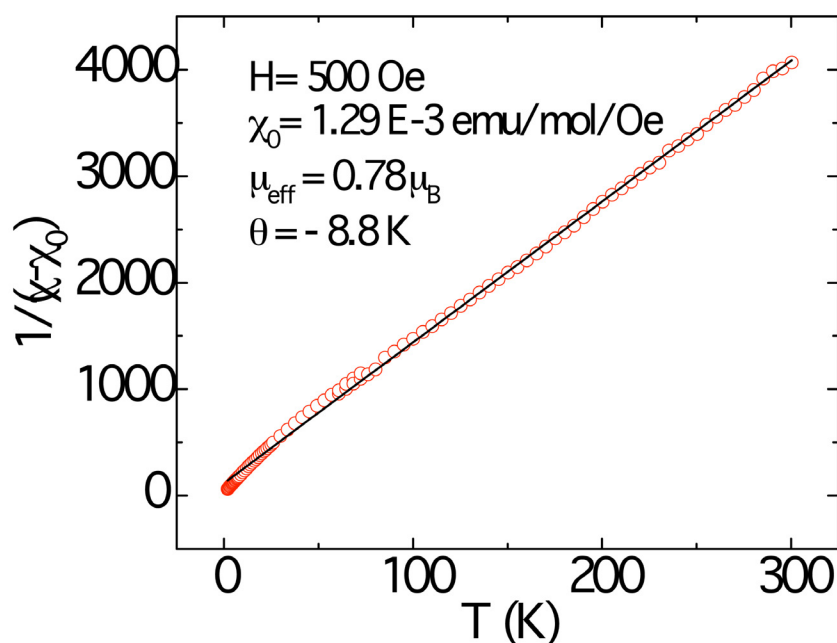

**Figure S1.** The modified Curie-Weiss fitting results of  $\text{Cu}_3\text{Ru}_6\text{Sb}_8$  for  $H=500 \text{ Oe}$

### ***Resistivity.***

The temperature dependence of resistivity measured on a sintered polycrystalline pellet of  $\text{Cu}_3\text{Ru}_6\text{Sb}_8$  shows a metallic behavior (Figure S2). The resistivity monotonically decreases on lowering the temperature until about 19 K. At lower temperatures, the resistivity is almost temperature-independent—a typical behavior for a metal. A resistivity of  $2.35 \times 10^{-6} \text{ } \Omega\cdot\text{m}$  was estimated for  $\text{Cu}_3\text{Ru}_6\text{Sb}_8$  at 300 K, also indicating a typical metallic-like conductivity. The residual resistivity ratio ( $\rho_{300\text{K}}/\rho_{5\text{K}}$ ) of 3.2 is suggestive of grain-boundary contribution to the conductivity of the sintered polycrystalline pellet.

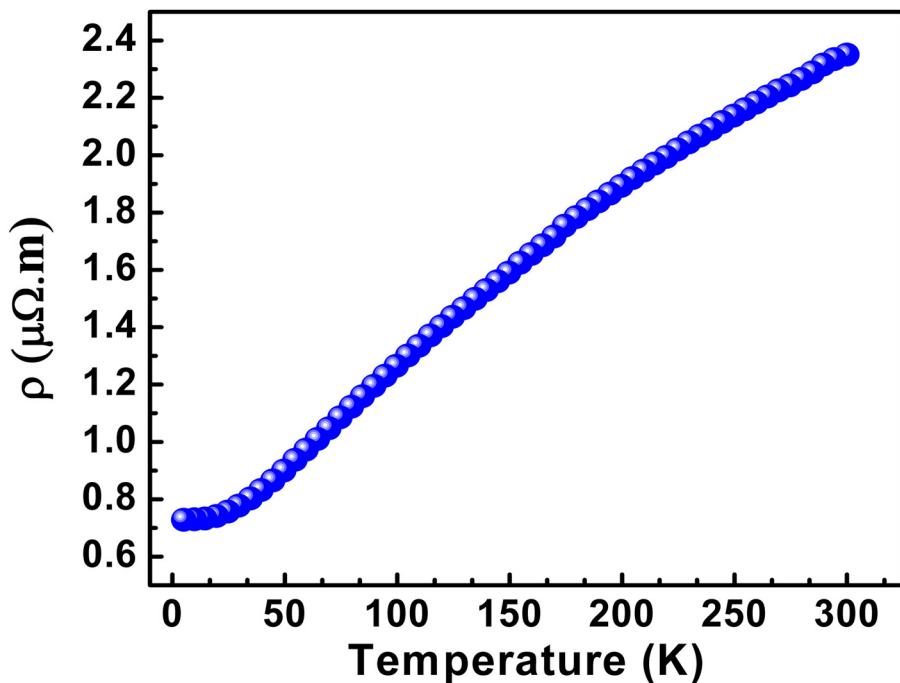

**Figure S2.** The temperature dependence of resistivity of polycrystalline  $\text{Cu}_3\text{Ru}_6\text{Sb}_8$ .

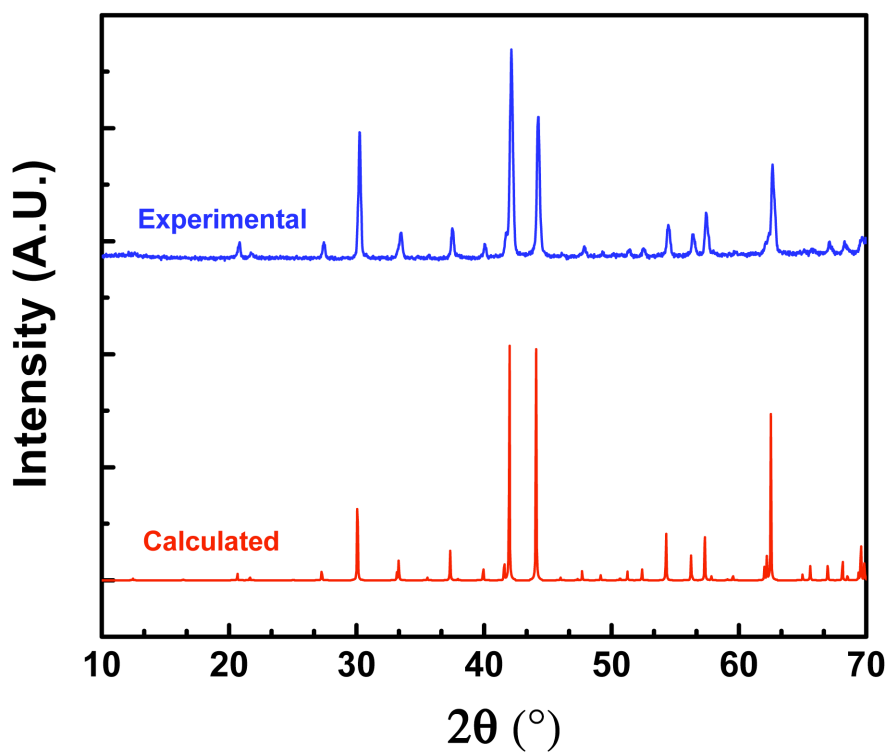

Figure S3. Experimental and calculated powder X-ray diffraction pattern of  $\text{Cu}_3\text{Ru}_6\text{Sb}_8$ .
